# Supplementary material for: Identification of intermediates of a molecular ruthenium catalyst for water oxidation using in situ electrochemical X-ray absorption spectroscopy
Source: Royal Society of Chemistry journal article supplement (doi:10.1039/d1cp03837k), 2021-01-01
Supplement: d1cp03837k1.pdf [file d1cp03837k1.pdf]

## Supporting Information

Identification of intermediates of a molecular ruthenium catalyst for water oxidation using *in-situ* electrochemical X-ray absorption spectroscopy

Lin Li,<sup>\*a,b¶</sup> Huacai Yan,<sup>c¶</sup> Fusheng Li,<sup>d</sup> Qingyu Kong,<sup>c</sup> Chunze Yuan<sup>a,b</sup> and Tsu-Chien Weng<sup>\*a,b</sup>

<sup>a</sup> School of Physical Science and Technology, ShanghaiTech University, Shanghai 201210, China

<sup>b</sup> Center for Transformative Science, ShanghaiTech University, Shanghai 201210, China

<sup>c</sup> Synchrotron SOLEIL, L'Orme des Merisiers Saint-Aubin, BP 48 91192 Gif sur Yvette Cedex, France

<sup>d</sup> State Key Lab of Fine Chemicals, Institute of Artificial Photosynthesis, DUT-KTH Joint Education and Research Center on Molecular Devices, Dalian University of Technology (DUT), 116024 Dalian, China

<sup>¶</sup>These authors contributed equally.

\*Corresponding author: [lilin1@shanghaitech.edu.cn](mailto:lilin1@shanghaitech.edu.cn); [wengzq@shanghaitech.edu.cn](mailto:wengzq@shanghaitech.edu.cn)

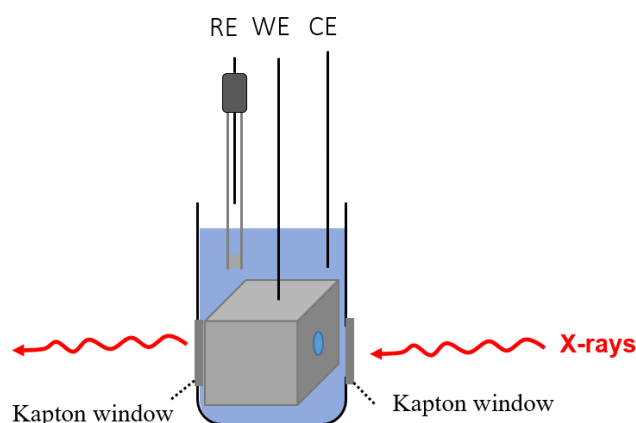

**Figure S1.** Illustration of in situ electrochemical cell. The cell contains a Kapton film as a window, which allows X-ray pass through. The working electrode (WE), reference electrode (RE), and counter electrode (CE) are glassy carbon foam, Ag/AgCl, and Pt respectively.

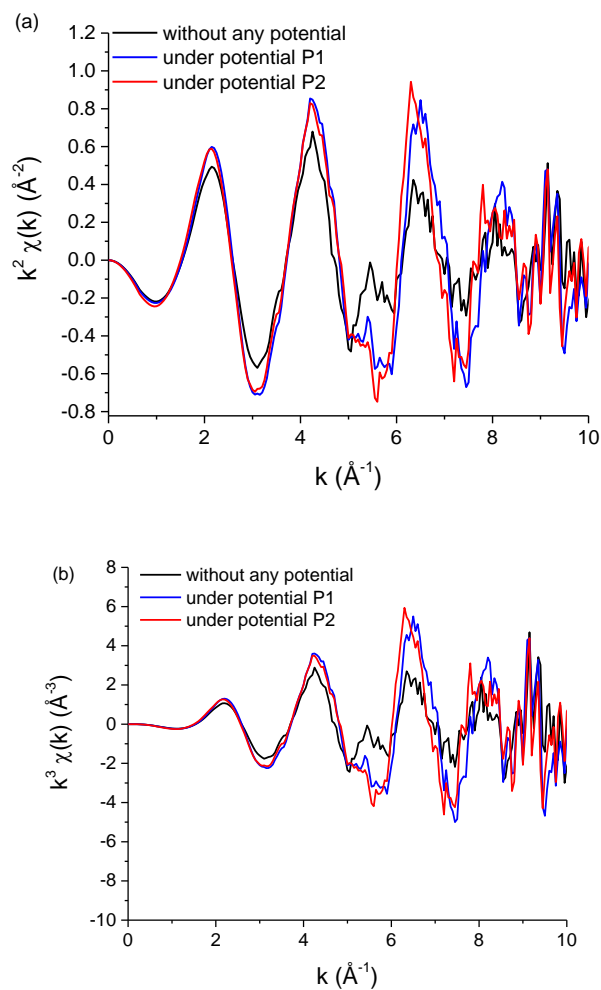

**Figure S2.** (a)  $k^2$ -weighted and (b)  $k^3$ -weighted EXAFS data  $k^2\chi(k)$  of complex 1 in 0.1 M  $\text{HNO}_3$  under no controlled potential (black line), under potential P1 (blue line) and potential P2 (red line).

**Table S1.** Best-fit parameters obtained from the EXAFS Ru K-edge of complex 1 in 0.1 M  $\text{HNO}_3$  under no controlled potential and under potentials P1 and P2

| Fit          | Shell, $N^a$ | $R^b$ , $\text{\AA}$ | $\sigma^2(10^{-3})^c$ | R-factor | Reduced $\chi$ -square |
|--------------|--------------|----------------------|-----------------------|----------|------------------------|
| No potential | Ru—N, 4      | 2.17                 | 4                     | 0.01     | 165                    |
|              | Ru—O, 2      | 2.42                 | 2                     |          |                        |
| P1           | Ru—N, 4      | 2.12                 | 13                    | 0.03     | 382                    |
|              | Ru—O, 3      | 2.17                 |                       |          |                        |
| P2           | Ru—O3, 1     | 2.02                 | 10                    | 0.07     | 233                    |
|              | Ru—O2, 2     | 2.10                 |                       |          |                        |
|              | Ru—N3, 4     | 2.15                 |                       |          |                        |

<sup>a</sup>coordination number per Ru center, <sup>b</sup>Ru-backscatter distance, <sup>c</sup>Debye-Waller factor. R-factor and reduced  $\chi$ -square are the goodness of the fit parameters. Amplitude reduction factor  $S_0^2 = 1$  was used in all the fits.

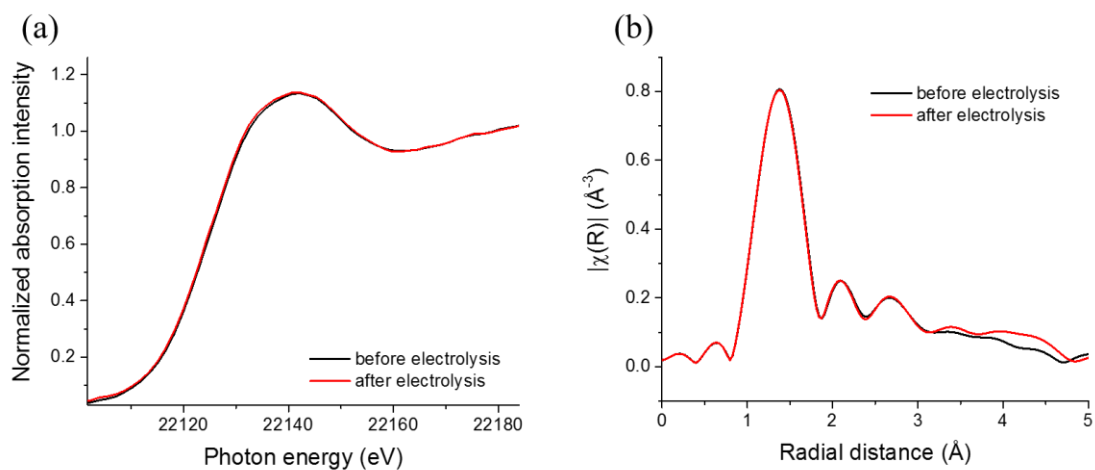

**Figure S3** (a). Normalized XANES at Ru K-edge and (b) Fourier transformed EXAFS spectra of complex 1 in 0.1 M HNO<sub>3</sub> before and after electrolysis.

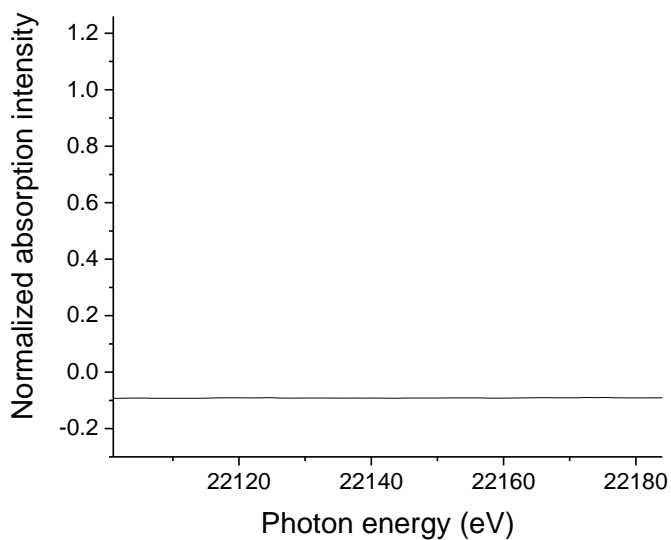

**Figure S4**. Normalized XANES at Ru K-edge and working electrode 0.1 M HNO<sub>3</sub> after experiment.

**Table S2**. Fit parameters obtained from EXAFS Ru K-edge of complex 1 in 0.1 M HNO<sub>3</sub> under no controlled potential, under potential P1 and potential P2.

| Fit                                                                                                                                            | Shell, N | R, Å | $\sigma^2(10^{-3})$ | $\Delta E_0$ | $\Delta R$ | R <sub>eff</sub> | R-factor | Reduced $\chi$ -square |
|------------------------------------------------------------------------------------------------------------------------------------------------|----------|------|---------------------|--------------|------------|------------------|----------|------------------------|
| under no controlled potential<br>The crystal structure used for EXAFS fitting is from reference 1 <sup>1</sup><br>1-7.3 k-space, 1-2.4 R-space |          |      |                     |              |            |                  |          |                        |
| 1                                                                                                                                              | Ru—N, 6  | 2.19 | 25                  | 2.36         | 0.10       | 2.09             | 0.08     | 609                    |
| 2                                                                                                                                              | Ru—N1, 1 | 2.07 | 3                   | 7.47         | 0.16       | 1.91             | 0.14     |                        |
|                                                                                                                                                | Ru—N2, 1 | 2.11 |                     |              | 0.16       | 1.94             |          |                        |
|                                                                                                                                                | Ru—N4, 2 | 2.24 |                     |              | 0.17       | 2.07             |          |                        |

|                                                                                                                                              |          |      |    |      |      |      |       |      |
|----------------------------------------------------------------------------------------------------------------------------------------------|----------|------|----|------|------|------|-------|------|
|                                                                                                                                              | Ru—O2, 1 | 2.39 |    |      | 0.18 | 2.17 |       |      |
|                                                                                                                                              | Ru—O3, 1 | 2.35 |    |      | 0.18 | 2.21 |       |      |
| 3                                                                                                                                            | Ru—N, 4  | 2.17 | 5  | 7.47 | 0.23 | 1.95 | 0.02  | 581  |
|                                                                                                                                              | Ru—O, 2  | 2.42 |    |      | 0.25 | 2.17 |       |      |
| 4                                                                                                                                            | Ru—N, 4  | 2.17 | 5  | 7.85 | 0.23 | 1.95 | 0.02  | 381  |
|                                                                                                                                              | Ru—O, 2  | 2.42 | 3  |      | 0.25 | 2.17 |       |      |
| 0.8-8 k-space, 1-2.4 R-space                                                                                                                 |          |      |    |      |      |      |       |      |
| 5                                                                                                                                            | Ru—N, 4  | 2.17 | 4  | 7.67 | 0.23 | 1.95 | 0.01  | 165  |
|                                                                                                                                              | Ru—O, 2  | 2.42 | 2  |      | 0.25 | 2.17 |       |      |
| under no controlled potential<br>The crystal structure used for EXAFS fitting is from reference 2 <sup>2</sup><br>1-7.3 k-space, 1-2 R-space |          |      |    |      |      |      |       |      |
| 6                                                                                                                                            | Ru—N, 6  | 2.18 | 25 | 2.57 | 0.08 | 2.10 | 0.06  | 1337 |
| 7                                                                                                                                            | Ru—N1, 2 | 2.06 | 3  | 7.47 | 0.14 | 1.92 | 0.12  | 2400 |
|                                                                                                                                              | Ru—N2, 2 | 2.22 |    |      |      | 2.08 |       |      |
|                                                                                                                                              | Ru—O1, 2 | 2.33 |    |      |      | 2.32 |       |      |
| 8                                                                                                                                            | Ru—N2, 4 | 2.17 | 15 | 6.94 | 0.08 | 2.08 | 0.08  | 1876 |
|                                                                                                                                              | Ru—O, 2  | 2.27 |    |      |      | 2.18 |       |      |
| 9                                                                                                                                            | Ru—N1, 4 | 2.18 | 3  | 8.57 | 0.25 | 1.92 | 0.02  | 375  |
|                                                                                                                                              | Ru—O, 2  | 2.44 |    | 8.57 |      | 2.18 |       |      |
| under potential P1<br>1-7.3 k-space, 1-2 R-space                                                                                             |          |      |    |      |      |      |       |      |
| 10                                                                                                                                           | Ru—N, 6  | 2.11 | 12 |      |      |      | 0.071 | 5631 |
| under potential P1<br>The crystal structure used for EXAFS fitting is from reference 2 <sup>2</sup><br>1-10 k-space, 1-1.86 R-space          |          |      |    |      |      |      |       |      |
| 11                                                                                                                                           | Ru—N2, 2 | 2.09 | 9  | 4.61 | 0.09 | 1.99 | 0.03  | 408  |
|                                                                                                                                              | Ru—O2, 1 | 2.14 |    |      |      | 2.04 |       |      |
|                                                                                                                                              | Ru—O3, 1 | 2.14 |    |      |      | 2.04 |       |      |
|                                                                                                                                              | Ru—N3, 2 | 2.17 |    |      |      | 2.07 |       |      |
| 12                                                                                                                                           | Ru—N2, 2 | 2.09 | 13 | 5.03 | 0.10 | 1.99 | 0.03  | 385  |
|                                                                                                                                              | Ru—O2, 2 | 2.14 |    |      |      | 2.04 |       |      |
|                                                                                                                                              | Ru—O3, 1 | 2.15 |    |      |      | 2.04 |       |      |
|                                                                                                                                              | Ru—N3, 2 | 2.18 |    |      |      | 2.07 |       |      |
| 13                                                                                                                                           | Ru—N2, 1 | 2.08 | 10 | 4.61 | 0.08 | 1.99 | 0.03  | 417  |
|                                                                                                                                              | Ru—O2, 2 | 2.12 |    |      |      | 2.04 |       |      |
|                                                                                                                                              | Ru—O3, 1 | 2.13 |    |      |      | 2.04 |       |      |
|                                                                                                                                              | Ru—N3, 2 | 2.16 |    |      |      | 2.07 |       |      |
| 14                                                                                                                                           | Ru—N2, 2 | 2.09 | 10 | 4.61 | 0.09 | 1.99 | 0.03  | 417  |
|                                                                                                                                              | Ru—O2, 2 | 2.14 |    |      |      | 2.04 |       |      |
|                                                                                                                                              | Ru—O3, 1 | 2.14 |    |      |      | 2.04 |       |      |
|                                                                                                                                              | Ru—N3, 1 | 2.17 |    |      |      | 2.07 |       |      |
| 15                                                                                                                                           | Ru—N2, 4 | 2.12 | 13 | 5.03 | 0.12 | 1.99 | 0.03  | 382  |
|                                                                                                                                              | Ru—O2, 3 | 2.17 |    |      |      | 2.04 |       |      |

|                                                                                                                                     |                                  |                      |    |                      |            |                      |       |     |
|-------------------------------------------------------------------------------------------------------------------------------------|----------------------------------|----------------------|----|----------------------|------------|----------------------|-------|-----|
| 16                                                                                                                                  | Ru—N2, 4<br>Ru—O2, 2             | 2.12<br>2.17         | 9  | 4.89                 | 0.12       | 1.99<br>2.04         | 0.03  | 420 |
| 17                                                                                                                                  | Ru—N2, 3<br>Ru—O2, 3             | 2.11<br>2.15         | 10 | 4.89                 | 0.11       | 1.99<br>2.04         | 0.03  | 429 |
| 18                                                                                                                                  | Ru—O2, 3<br>Ru—N3, 4             | 2.13<br>2.16         | 14 | 5.34                 | 0.08       | 2.04<br>2.07         | 0.03  | 392 |
| 19                                                                                                                                  | Ru—O2, 2<br>Ru—N3, 4             | 2.11<br>2.15         | 10 | 4.61                 | 0.07       | 2.04<br>2.07         | 0.03  | 406 |
| 20                                                                                                                                  | Ru—O2, 3<br>Ru—N3, 3             | 2.11<br>2.15         | 10 | 4.61                 | 0.07       | 2.04<br>2.07         | 0.03  | 414 |
| 21                                                                                                                                  | Ru—N2, 4<br>Ru—O3, 3             | 2.12<br>2.17         | 13 | 5.03                 | 0.12       | 1.99<br>2.04         | 0.03  | 382 |
| 22                                                                                                                                  | Ru—N2, 4<br>Ru—O3, 2             | 2.12<br>2.17         | 8  | 4.89                 | 0.12       | 1.99<br>2.04         | 0.03  | 419 |
| 23                                                                                                                                  | Ru—N2, 3<br>Ru—O3, 3             | 2.11<br>2.16         | 9  | 4.89                 | 0.11       | 1.99<br>2.04         | 0.03  | 429 |
| under potential P1<br>The crystal structure used for EXAFS fitting is from reference 2 <sup>2</sup><br>1-10 k-space, 1-1.92 R-space |                                  |                      |    |                      |            |                      |       |     |
| 24                                                                                                                                  | Ru—N2,4<br>Ru—O2,2               | 2.08<br>2.19         | 5  | 3.51<br>3.69         | 0.005      | 2.08<br>2.19         | 0.064 | 597 |
| 25                                                                                                                                  | Ru—N2,4<br>Ru—O2,3               | 2.07<br>2.18         | 8  | 3.44<br>3.61         | -<br>0.005 | 2.08<br>2.19         | 0.064 | 556 |
| under potential P1<br>The crystal structure used for EXAFS fitting is from reference 3 <sup>3</sup><br>1-10 k-space, 1-1.92 R-space |                                  |                      |    |                      |            |                      |       |     |
| 26                                                                                                                                  | Ru—N1, 2<br>Ru—O1, 2<br>Ru—N2, 2 | 2.06<br>2.12<br>2.14 | 7  | 4.07<br>4.20<br>4.24 | 0.07       | 1.99<br>2.05<br>2.07 | 0.062 | 597 |
| 27                                                                                                                                  | Ru—N1, 2<br>Ru—O1, 3<br>Ru—N2, 2 | 2.06<br>2.13<br>2.15 | 11 | 4.20<br>4.33<br>4.37 | 0.07       | 1.99<br>2.05<br>2.07 | 0.061 | 552 |
| 28                                                                                                                                  | Ru—N1, 4<br>Ru—O1, 2             | 2.1<br>2.12          | 9  | 4.41<br>4.45         | 0.05       | 2.05<br>2.07         | 0.064 | 605 |
| 29                                                                                                                                  | Ru—N1, 4<br>Ru—O1, 3             | 2.09<br>2.15         | 10 | 4.32<br>4.45         | 0.09       | 1.99<br>2.05         | 0.062 | 554 |

| under potential P2                                                                        |                                  |                      |    |      |                         |                      |       |      |
|-------------------------------------------------------------------------------------------|----------------------------------|----------------------|----|------|-------------------------|----------------------|-------|------|
| The crystal structure (Ru <sup>IV</sup> dimer) used for EXAFS fitting is from reference 1 |                                  |                      |    |      |                         |                      |       |      |
| 1-7.6 k-space, 1-1.92 R-space                                                             |                                  |                      |    |      |                         |                      |       |      |
| 30                                                                                        | Ru—N, 6                          | 2.10                 | 9  | 1.14 | -<br>0.002              | 2.10                 | 0.016 | 1981 |
| 31                                                                                        | Ru—O3, 1<br>Ru—O2, 2<br>Ru—N3, 4 | 2.01<br>2.09<br>2.13 | 9  | 7.47 | 0.050<br>0.052<br>0.053 | 1.96<br>2.03<br>2.08 | 0.025 | 3418 |
| 32                                                                                        | Ru—O3, 1<br>Ru—O2, 1<br>Ru—N3, 4 | 2.00<br>2.08<br>2.13 | 6  | 7.07 | 0.042<br>0.044<br>0.045 | 1.96<br>2.03<br>2.08 | 0.018 | 3414 |
| under potential P2                                                                        |                                  |                      |    |      |                         |                      |       |      |
| The crystal structure (Ru <sup>IV</sup> dimer) used for EXAFS fitting is from reference 1 |                                  |                      |    |      |                         |                      |       |      |
| 1-10 k-space, 1-1.92 R-space                                                              |                                  |                      |    |      |                         |                      |       |      |
| 33                                                                                        | Ru—O3, 1<br>Ru—O2, 2<br>Ru—N3, 4 | 2.02<br>2.10<br>2.15 | 10 | 8.01 | 0.063<br>0.065<br>0.067 | 1.96<br>2.03<br>2.08 | 0.079 | 233  |

N, coordination number for per Ru center. R, Ru-backscatter distance.  $\sigma^2$ , Debye-Waller factor.  $\Delta E_0$ , the energy shift parameter.  $\Delta R$ , change in half-path length.  $R_{eff}$ , initial half path length. R-factor and Reduced  $\chi$ -square are the goodness of the fit parameters. Amplitude reduction factor  $S_0^2 = 1$  was used in all fits.

#### References:

1. Duan, L.; Fischer, A.; Xu, Y.; Sun, L., *J. Am. Chem. Soc.* **2009**, *131*, 10397-10399.
2. Duan, L.; Wang, L.; Inge, A. K.; Fischer, A.; Zou, X.; Sun, L., *Inorg. Chem.* **2013**, *52*, 7844-7852.
3. Concepcion, J. J.; Zhong, D. K.; Szalda, D. J.; Muckerman, J. T.; Fujita, E., *Chem. Commun.* **2015**, *51*, 4105-4108.
